# Supplementary material
Source: HighWire-hosted journal article supplement (http://jnis.bmj.com/highwire/filestream/165200/field_highwire_adjunct_files/0/neurintsurg-2020-016724supp001_data_supplement.pdf)
Supplement: neurintsurg-2020-016724supp001_data_supplement.pdf [file neurintsurg-2020-016724supp001_data_supplement.pdf]

## Supplementary Material 1

This supplementary material presents the lists of studies respectively included in the Quantitative Analysis (A) and (B).

### I. List of studies included in Quantitative Analysis (A)

- Berg, P. et al. (2018) 'Virtual stenting of intracranial aneurysms: A pilot study for the prediction of treatment success based on hemodynamic simulations', *The International Journal of Artificial Organs*, 41(11), pp. 698–705. doi: 10.1177/0391398818775521.
- Chong, W. et al. (2014) 'Computational hemodynamics analysis of intracranial aneurysms treated with flow diverters: correlation with clinical outcomes', *American Journal of Neuroradiology*, 35(1), pp. 136–142. doi: 10.3174/ajnr.A3790.
- Karmonik, C. et al. (2013) 'Hemodynamics at the ostium of cerebral aneurysms with relation to post-treatment changes by a virtual flow diverter: a computational fluid dynamics study', in *Conference proceedings: ... Annual International Conference of the IEEE Engineering in Medicine and Biology Society. IEEE Engineering in Medicine and Biology Society. Annual Conference*, pp. 1895–1898. doi: 10.1109/EMBC.2013.6609895.
- Kulcsár, Z. et al. (2012) 'Flow diversion treatment: intra-aneurysmal blood flow velocity and WSS reduction are parameters to predict aneurysm thrombosis', *Acta Neurochirurgica*, 154(10), pp. 1827–1834. doi: 10.1007/s00701-012-1482-2.
- Li, Y. et al. (2018) 'Numerical simulation of aneurysmal haemodynamics with calibrated porous-medium models of flow-diverting stents', *Journal of Biomechanics*, 80, pp. 88–94. doi: 10.1016/j.jbiomech.2018.08.026.
- Mut, F. et al. (2015) 'Association between hemodynamic conditions and occlusion times after flow diversion in cerebral aneurysms', *Journal of Neurointerventional Surgery*, 7(4), pp. 286–290. doi: 10.1136/neurintsurg-2013-011080.
- Paliwal, N. et al. (2017) 'Association between hemodynamic modifications and clinical outcome of intracranial aneurysms treated using flow diverters', in Webster, R. J. and Fei, B. (eds). *SPIE Medical Imaging*, Orlando, Florida, United States, p. 101352F. doi: 10.1117/12.2254584.
- Paliwal, N. et al. (2018) 'Outcome prediction of intracranial aneurysm treatment by flow diverters using machine learning', *Neurosurgical Focus*, 45(5), p. E7. doi: 10.3171/2018.8.FOCUS18332.
- Sindeev, S. et al. (2018) 'Phase-contrast MRI versus numerical simulation to quantify hemodynamical changes in cerebral aneurysms after flow diverter treatment', *PLoS One*, 13(1), p. e0190696. doi: 10.1371/journal.pone.0190696.
- Xiang, J. et al. (2015) 'High-fidelity virtual stenting: modeling of flow diverter deployment for hemodynamic characterization of complex intracranial aneurysms', *Journal of Neurosurgery*, 123(4), pp. 832–840. doi: 10.3171/2014.11.JNS14497.
- Zhang, M. et al. (2017) 'Haemodynamic effects of stent diameter and compaction ratio on flow-diversion treatment of intracranial aneurysms: A numerical study of a successful and an unsuccessful case', *Journal of Biomechanics*, 58, pp. 179–186. doi: 10.1016/j.jbiomech.2017.05.001.
- Zhang, Y., Chong, W. and Qian, Y. (2013) 'Investigation of intracranial aneurysm hemodynamics following flow diverter stent treatment', *Medical Engineering & Physics*, 35(5), pp. 608–615. doi: 10.1016/j.medengphy.2012.07.005.

## II. List of studies included in Quantitative Analysis (B)

- Damiano, R. J. et al. (2015) 'Finite element modeling of endovascular coiling and flow diversion enables hemodynamic prediction of complex treatment strategies for intracranial aneurysm', *Journal of Biomechanics*, 48(12), pp. 3332–3340. doi: 10.1016/j.jbiomech.2015.06.018.
- Damiano, R. J. et al. (2017) 'Compacting a Single Flow Diverter versus Overlapping Flow Diverters for Intracranial Aneurysms: A Computational Study', *American Journal of Neuroradiology*, 38(3), pp. 603–610. doi: 10.3174/ajnr.A5062.
- Janiga, G. et al. (2015) 'An automatic CFD-based flow diverter optimization principle for patient-specific intracranial aneurysms', *Journal of Biomechanics*, 48(14), pp. 3846–3852. doi: 10.1016/j.jbiomech.2015.09.039.
- Li, Y. et al. (2018) 'Numerical simulation of aneurysmal haemodynamics with calibrated porous-medium models of flow-diverting stents', *Journal of Biomechanics*, 80, pp. 88–94. doi: 10.1016/j.jbiomech.2018.08.026.
- Ma, D. et al. (2014) 'Enhanced aneurysmal flow diversion using a dynamic push-pull technique: an experimental and modeling study', *American Journal of Neuroradiology*, 35(9), pp. 1779–1785. doi: 10.3174/ajnr.A3933.
- Uchiyama, Y. et al. (2018) 'Hemodynamic Change In A Cerebral Aneurysm Treated By Double Stenting Technique', in *2018 40th Annual International Conference of the IEEE Engineering in Medicine and Biology Society (EMBC). 2018 40th Annual International Conference of the IEEE Engineering in Medicine and Biology Society (EMBC)*, Honolulu, HI: IEEE, pp. 1343–1346. doi: 10.1109/EMBC.2018.8512461.
- Ugron, A., Szikora, I. and Paál, G. (2014) 'Measurement of flow diverter hydraulic resistance to model flow modification in and around intracranial aneurysms', *Interventional Medicine & Applied Science*, 6(2), pp. 61–68. doi: 10.1556/IMAS.6.2014.2.2.
- Wang, C. et al. (2016) 'Flow diverter effect of LVIS stent on cerebral aneurysm hemodynamics: a comparison with Enterprise stents and the Pipeline device', *Journal of Translational Medicine*, 14(1), p. 199. doi: 10.1186/s12967-016-0959-9.
- Xiang, J. et al. (2014) 'Increasing flow diversion for cerebral aneurysm treatment using a single flow diverter', *Neurosurgery*, 75(3), pp. 286–294; discussion 294. doi: 10.1227/NEU.0000000000000409.
- Xiang, J. et al. (2015) 'High-fidelity virtual stenting: modeling of flow diverter deployment for hemodynamic characterization of complex intracranial aneurysms', *Journal of Neurosurgery*, 123(4), pp. 832–840. doi: 10.3171/2014.11.JNS14497.
- Zhang, M. et al. (2017) 'Haemodynamic effects of stent diameter and compaction ratio on flow-diversion treatment of intracranial aneurysms: A numerical study of a successful and an unsuccessful case', *Journal of Biomechanics*, 58, pp. 179–186. doi: 10.1016/j.jbiomech.2017.05.001.
